# Supplementary material
Source: Springer Nature journal article supplement (https://www.springermedizin.de/resource/supplementary/12913_2013_3035_MOESM2_ESM.pdf/9533284)

**Topic:** Uncertainty about diagnosis because of being called into GP practice for so many repeat tests

**Quote:** "I didn't know I had a problem because I was having blood tests last year for various things and I had my kidney blood test done about three times"

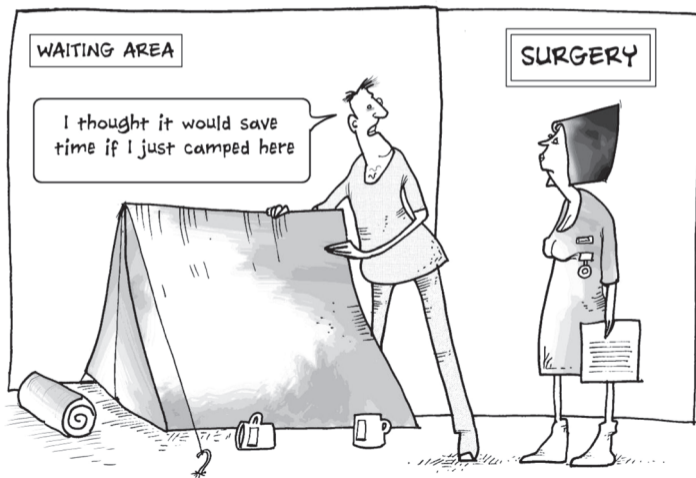

Supplement: MOESM2 [file 9533284]
